# Supplementary material for: Autologous stem cell transplantation in T-cell/histiocyte-rich large B-cell lymphoma: EBMT Lymphoma Working Party study
Source: PubMed Central journal article supplement — Blood Adv. 2024 Sep 3;8(21):5571–8. doi: 10.1182/bloodadvances.2024013152 (PMC11541691; doi:10.1182/bloodadvances.2024013152), 2024-09-03
Supplement: BLOODA_ADV-2024-013152-mmc1.pdf [file BLOODA_ADV-2024-013152-mmc1.pdf]

## **Supplemental Tables**

***Supplemental Table 1: Multivariate Analysis: All DLBCL patients***

***Supplemental Table 2: AutoHCT in DLBCL 0-12 months / > 12 months after diagnosis: Patient characteristics***

***Supplemental Table 3: Propensity-matched cohort analysis: Patient characteristics***

## Multivariate analysis: All patients

|                               |            | PFS (n = 4809)      |                  | OS (n = 5415)       |                  | RI (n = 4812)       |                  | NRM (n = 4812)      |                  |
|-------------------------------|------------|---------------------|------------------|---------------------|------------------|---------------------|------------------|---------------------|------------------|
|                               |            | HR<br>(95% CI)      | p-value          |
| <b>Lymphoma subtype</b>       | DLBCL      | 1                   |                  | 1                   |                  | 1                   |                  | 1                   |                  |
|                               | THRLBCL    | 0.58<br>(0.41-0.82) | <i>0,002</i>     | 0.78<br>(0.54-1.12) | 0,18             | 0.46<br>(0.31-0.7)  | <i>&lt;0.001</i> | 1.39<br>(0.73-2.67) | 0,32             |
| <b>Sex patients</b>           | Male       | 1                   |                  | 1                   |                  | 1                   |                  | 1                   |                  |
|                               | Female     | 0.99<br>(0.9-1.09)  | 0,83             | 0.9<br>(0.8-1.01)   | 0,08             | 1.01<br>(0.91-1.12) | 0,89             | 0.89<br>(0.68-1.15) | 0,37             |
| <b>Age at HCT by 10 year</b>  |            | 1.21<br>(1.15-1.26) | <i>&lt;0.001</i> | 1.26<br>(1.2-1.33)  | <i>&lt;0.001</i> | 1.17<br>(1.12-1.23) | <i>&lt;0.001</i> | 1.47<br>(1.29-1.68) | <i>&lt;0.001</i> |
| <b>Disease status at HCT</b>  | CR         | 1                   |                  | 1                   |                  | 1                   |                  | 1                   |                  |
|                               | PR         | 1.44<br>(1.3-1.6)   | <i>&lt;0.001</i> | 1.46<br>(1.29-1.65) | <i>&lt;0.001</i> | 1.52<br>(1.36-1.69) | <i>&lt;0.001</i> | 1.06<br>(0.81-1.39) | 0,67             |
| <b>Delay Diagnosis to HCT</b> | >12 months | 1                   |                  | 1                   |                  | 1                   |                  | 1                   |                  |
|                               | 12 months  | 0.89<br>(0.8-0.99)  | <i>0,04</i>      | 0.91<br>(0.8-1.03)  | 0,15             | 0.91<br>(0.81-1.02) | 0,1              | 0.81<br>(0.61-1.07) | 0,14             |
| <b>Karnofsky-Index</b>        | < 90       | 1                   |                  | 1                   |                  | 1                   |                  | 1                   |                  |
|                               | >= 90      | 0.81<br>(0.73-0.9)  | <i>&lt;0.001</i> | 0.72 (0.63-0.82)    | <i>&lt;0.001</i> | 0.85<br>(0.75-0.96) | <i>0,007</i>     | 0.64<br>(0.49-0.84) | <i>&lt;0.001</i> |
| <b>Number of lines</b>        | 2          | 1                   |                  | 1                   |                  | 1                   |                  | 1                   |                  |
|                               | >2         | 1.28<br>(1.15-1.43) | <i>&lt;0.001</i> | 1.22<br>(1.08-1.39) | <i>0,002</i>     | 1.32<br>(1.17-1.48) | <i>&lt;0.001</i> | 1.07<br>(0.8-1.43)  | 0,65             |

**Abbreviations:** THRLBCL: T-cell/histiocyte-rich large cell B-cell lymphoma, DLBCL: Diffuse large B-cell lymphoma, HCT: Hematopoietic Stem cell Transplantation, IPI: International Prognostic Index, CR: Complete remission, PR: Partial remission, HR: Hazard ratio, CI: Confidence Interval

Supplemental Table 2

**Patient characteristics:**  
**DLCBCL autoHCT**  
**0-12 months / >12 months after diagnosis**

|                                                      |                      | 0-12 months<br>N = 3533 | >12 months<br>N = 1913 | <i>P-value</i> |
|------------------------------------------------------|----------------------|-------------------------|------------------------|----------------|
| <b>Age patients</b>                                  | median (range)       | 59.8<br>(18.3-81.1)     | 56.3<br>(18.1-81.2)    | < 0.0001       |
|                                                      |                      |                         |                        |                |
| <b>Sex Patients</b>                                  | Female               | 1412 (40)               | 762 (39.8)             | 0.9236         |
|                                                      | Male                 | 2121 (60)               | 1151 (60.2)            |                |
| <b>Karnofsky Index</b>                               | < 90                 | 930 (28.3)              | 520 (29.3)             | 0.411          |
|                                                      | >= 90                | 2362 (71.7)             | 1252 (70.7)            |                |
|                                                      | missing              | 241                     | 141                    |                |
| <b>HCT Comorbidity Index</b>                         | 0                    | 1936 (62.5)             | 1097 (65.8)            | 0.0607         |
|                                                      | 1 - 2                | 669 (21.6)              | 336 (20.2)             |                |
|                                                      | 3 or more            | 493 (15.9)              | 233 (14)               |                |
|                                                      | missing              | 435                     | 247                    |                |
| <b>Transformed disease</b>                           | No                   | 3110 (92.2)             | 1443 (77.7)            | < 0.0001       |
|                                                      | Yes                  | 262 (7.8)               | 413 (22.3)             |                |
|                                                      | missing              | 161                     | 57                     |                |
| <b>International Prognostic index (Score points)</b> | Low risk (0-1)       | 449 (21.4)              | 185 (15.4)             | < 0.0001       |
|                                                      | Low-inter. risk (2)  | 567 (27)                | 308 (25.6)             |                |
|                                                      | High-inter. risk (3) | 638 (30.3)              | 365 (30.3)             |                |
|                                                      | High risk (4 or 5)   | 449 (21.4)              | 346 (28.7)             |                |
|                                                      | missing              | 1430                    | 709                    |                |
| <b>Number of lines</b>                               | 2                    | 2596 (73.5)             | 1376 (71.9)            | 0.2192         |
|                                                      | 3 or more            | 937 (26.5)              | 537 (28.1)             |                |
| <b>Disease status at HCT</b>                         | CR                   | 2258 (63.9)             | 944 (49.3)             | < 0.0001       |
|                                                      | PR                   | 1275 (36.1)             | 969 (50.7)             |                |

**Abbreviations:** THRLBCL: T-cell/histiocyte-rich large cell B-cell lymphoma, DLBCL: Diffuse large B-cell lymphoma, HCT: Hematopoietic Stem cell Transplantation, CR: Complete remission, PR: Partial remission

Supplemental Table 3

| Patient characteristics:<br>Propensity score matched cohorts |                      | THRLBCL      | DLBCL        | <i>P-value</i> |
|--------------------------------------------------------------|----------------------|--------------|--------------|----------------|
|                                                              |                      | N = 166      | N = 332      |                |
| Age patients                                                 | median (range)       | 48.3 (19-73) | 50.5 (18-77) | 0.6115         |
| Interval<br>diagnosis to HCT                                 | >12 months           | 108 (65)     | 207 (62)     | 0.5542         |
|                                                              | 0-12 months          | 58 (35)      | 125 (38)     |                |
| Sex Patients                                                 | Female               | 31 (19)      | 59 (18)      | 0.8049         |
|                                                              | Male                 | 135 (81)     | 273 (82)     |                |
| Karnofsky<br>Index                                           | < 90                 | 29 (18)      | 56 (17)      | 0.8662         |
|                                                              | >= 90                | 137 (83)     | 276 (83)     |                |
| HCT Comorbidity<br>Index                                     | 0                    | 117 (71)     | 227 (68)     | 0.8859         |
|                                                              | 1 - 2                | 28 (17)      | 59 (18)      |                |
|                                                              | 3 or more            | 21 (13)      | 46 (14)      |                |
| Transformed<br>disease                                       | No                   | 147 (91)     | 286 (89)     | 0.3515         |
|                                                              | Yes                  | 14 (9)       | 37 (12)      |                |
|                                                              | missing              | 5            | 9            |                |
| International<br>Prognostic index<br>(Score points)          | Low risk (0-1)       | 16 (15)      | 47 (23)      | 0.0532         |
|                                                              | Low-inter. risk (2)  | 33 (31)      | 63 (31)      |                |
|                                                              | High-inter. risk (3) | 36 (34)      | 43 (21)      |                |
|                                                              | High risk (4 -5)     | 21 (20)      | 52 (25)      |                |
|                                                              | missing              | 60           | 127          |                |
| Treatment lines<br>pre HCT                                   | 2 or more            | 166 (100)    | 332 (100)    | Not<br>done    |
| Disease status<br>at HCT                                     | CR                   | 105 (63)     | 230 (70)     | 0.1768         |
|                                                              | PR                   | 61 (37)      | 102 (31)     |                |

**Abbreviations:** THRLBCL: T-cell/histiocyte-rich large cell B-cell lymphoma, DLBCL: Diffuse large B-cell lymphoma, HCT: Hematopoietic Stem cell Transplantation, CR: Complete remission, PR: Partial remission

## Supplemental Figures

### ***Supplemental Figure 1: Prognostic factors for THRLBCL after autoHCT***

Hazard ratios with 95% Confidence intervals from multivariable regression using a Cox proportional hazards model of 5 independent variables assessed for prediction of **a)** PFS, **b)** OS, **c)** RI, **d)** NRM within THRLBCL patients undergoing autoHCT.

Kaplan-Meier curves from other DLBCL and THRLBCL patients depicting **e)** PFS of patients undergoing autoHCT within <12 months or, **f)** >12 months after diagnosis.

Supplemental Figure 1

Multivariate analysis of all THRLBCL patients

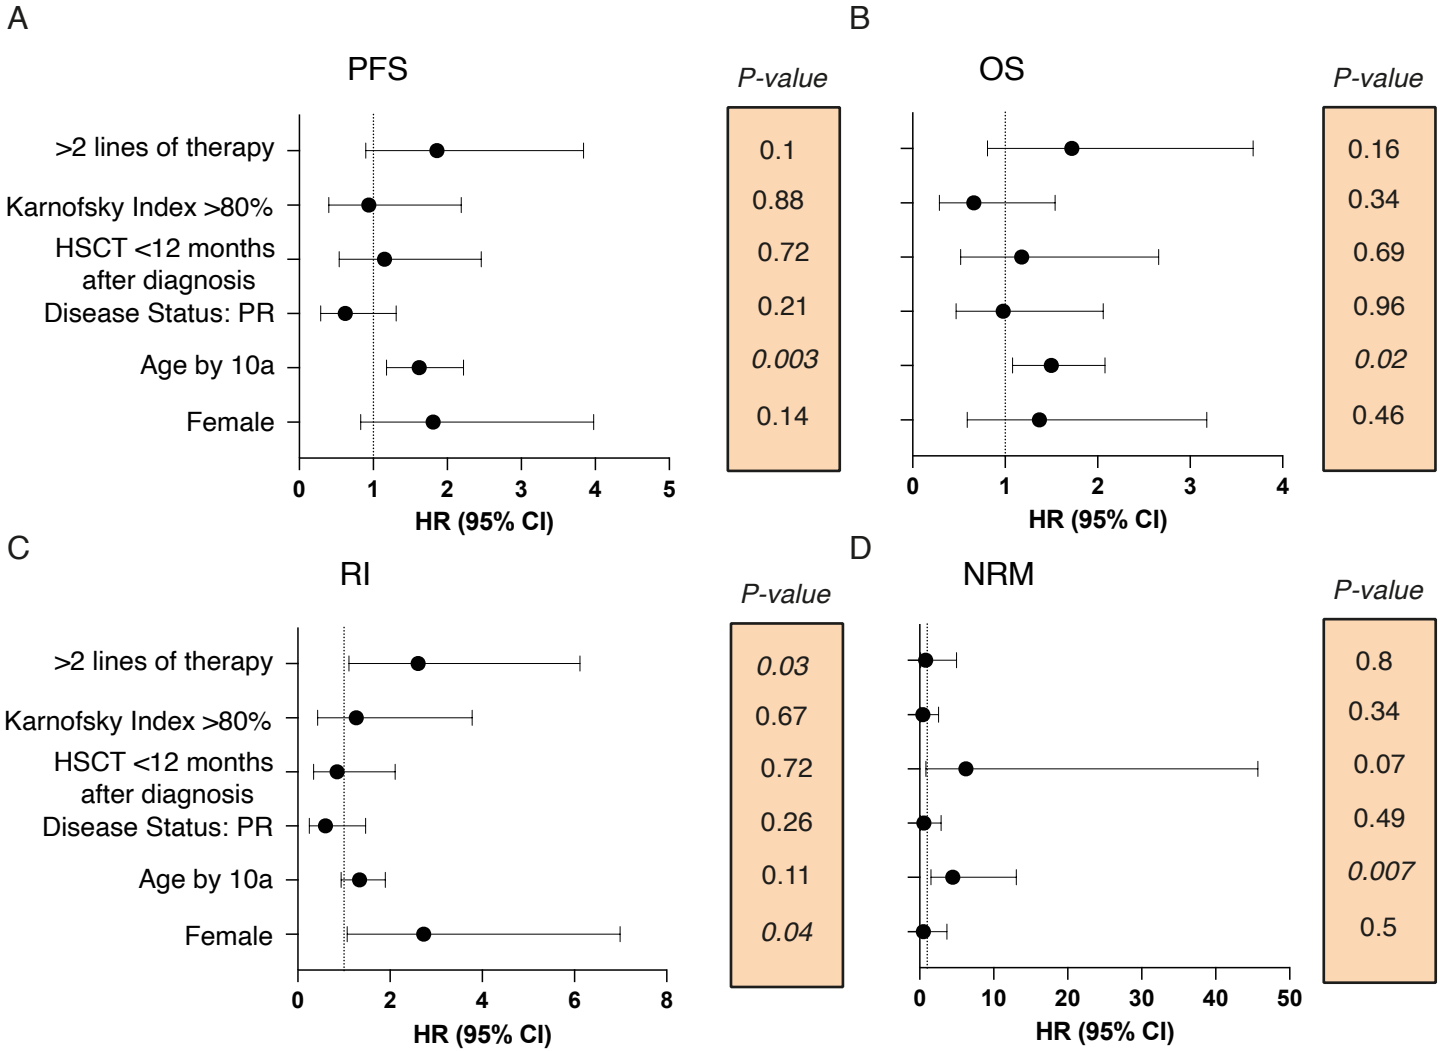

Outcomes by delay to auto HCT

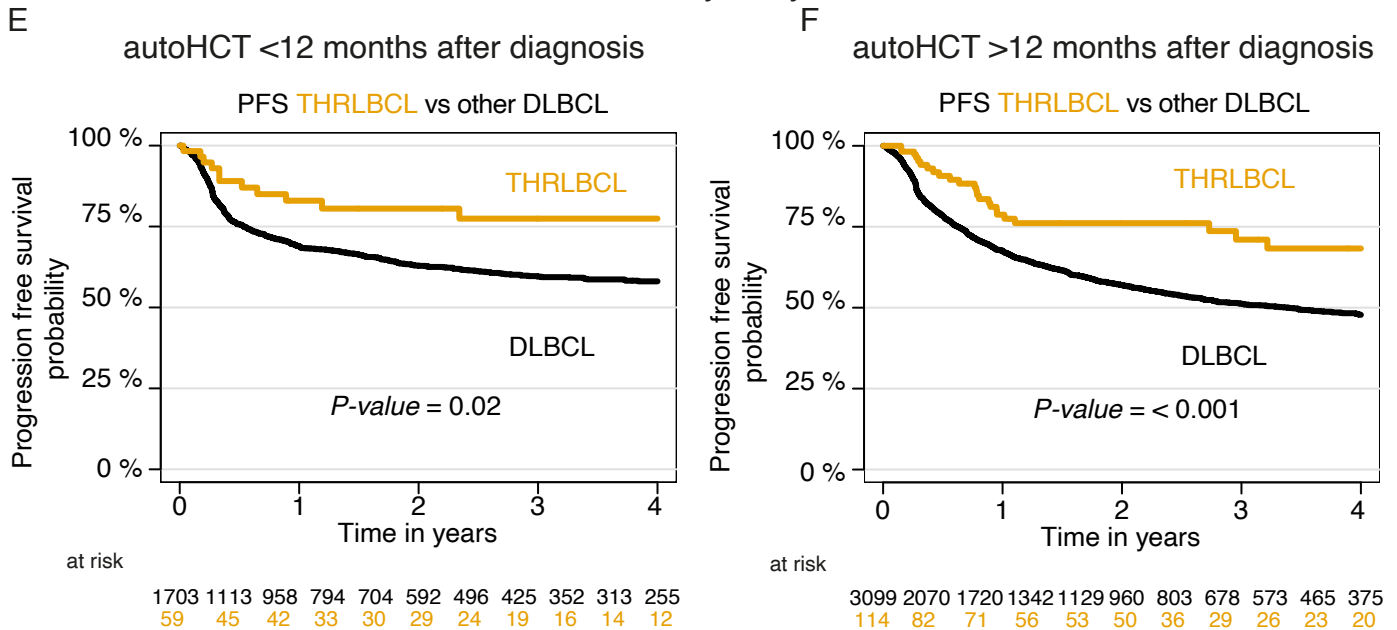

**Abbreviations:** PFS: Progression free survival, OS: Overall survival, NRM: Non-Relapse mortality, RI: Relapse incidence, THRLBCL: T-cell/histiocyte-rich large cell B-cell lymphoma, DLBCL: Diffuse large B-cell lymphoma, HCT: Hematopoietic Stem cell Transplantation, HR: Hazard ratio, CI: Confidence Interval
